# Supplementary material for: Cardiovascular Outcomes in Children with Multisystem Inflammatory Syndrome Treated with Therapeutic Plasma Exchange
Source: MDPI journal article supplement (doi:10.3390/children9111640), 2022-10-27
Supplement: s1 [file s1]

**Supplementary table S1.** Characteristics, symptoms, signs, comorbidities and laboratory findings of the patients

| Group A subjects | Gender | Age (months) | Symptoms and signs                                                                | Comorbidity                  | Laboratory   | Deceased patients |
|------------------|--------|--------------|-----------------------------------------------------------------------------------|------------------------------|--------------|-------------------|
| 1                | female | 60           | Fever, cough                                                                      |                              | Covid PCR +  |                   |
| 2                | male   | 9            | Fever, hepatitis                                                                  | Epilepsy                     | Covid PCR +  |                   |
| 3                | male   | 212          | Abdominal pain, vomiting, headache, tachypnea, anemia, thrombocytopenia           | Chronic renal failure        | Covid PCR -  |                   |
| 4                | female | 130          | Fever, hypotension                                                                |                              | Ig G +       |                   |
| 5                | male   | 121          | Fever, hypotension, oliguria, thrombocytopenia                                    | Acute lymphoblastic leukemia | Covid PCR +  | +                 |
| 6                | male   | 56           | Fever, abdominal pain, vomiting, diarrhea                                         |                              | Covid PCR -  |                   |
| 7                | male   | 124          | Fever, abdominal pain, vomiting, diarrhea                                         |                              | Covid PCR +  |                   |
| 8                | female | 153          | Fever, conjunctivitis, lymphadenopathy                                            |                              | Covid PCR +  |                   |
| 9                | male   | 204          | Fever, conjunctivitis, lymphadenopathy, red cracked lips                          |                              | Ig G and M + |                   |
| 10               | male   | 181          | Fever, abdominal pain, vomiting, diarrhea                                         |                              | Covid PCR +  |                   |
| 11               | female | 214          | Fever, abdominal pain, vomiting, diarrhea, red cracked lips, rash, conjunctivitis |                              | Ig G and M + |                   |
| 12               | male   | 144          | Fever, thrombocytopenia                                                           |                              | Covid PCR +  |                   |
| 13               | male   | 183          | Fever, abdominal pain, vomiting, diarrhea, hepatitis                              |                              | Ig G and M + |                   |
| 14               | female | 7            | Fever, conjunctivitis, lymphadenopathy                                            |                              | Ig G and M + |                   |
| 15               | female | 65           | Fever, abdominal pain, vomiting, diarrhea, conjunctivitis, lymphadenopathy        |                              | Ig G and M + |                   |
| 16               | male   | 138          | Chest pain, nausea                                                                |                              | Ig G and M + |                   |
| Group B subjects |        |              |                                                                                   |                              |              |                   |
| 1                | female | 119          | Fever, abdominal pain, vomiting, diarrhea, hypotension, thrombocytopenia          |                              | Ig G +       |                   |
| 2                | female | 210          | Fever, abdominal pain, vomiting, diarrhea, hypotension, shock, thrombocytopenia   | Inflammatory bowel disease   | Covid PCR -  |                   |
| 3                | male   | 180          | Fever, abdominal pain, vomiting, diarrhea                                         |                              | Covid PCR -  |                   |
| 4                | male   | 142          | Fever, abdominal pain, vomiting                                                   |                              | Covid PCR -  |                   |
| 5                | male   | 203          | Fever, cough, hypotension, shock                                                  |                              | Covid PCR -  |                   |
| 6                | male   | 188          | Fever, abdominal pain, vomiting, diarrhea                                         |                              | Covid PCR -  |                   |
| 7                | male   | 181          | Nausea, vomiting, hypotension, shock, thrombocytopenia                            |                              | Covid PCR -  | +                 |
| 8                | female | 176          | Fever, abdominal pain, vomiting, diarrhea, hypotension, thrombocytopenia          |                              | Covid PCR -  |                   |
| 9                | female | 182          | Fever, abdominal pain, vomiting, diarrhea                                         |                              | Covid PCR -  |                   |
| 10               | male   | 30           | Fever, cough                                                                      |                              | Covid PCR -  |                   |
| 11               | male   | 175          | Fever, abdominal pain, vomiting, diarrhea                                         |                              | Covid PCR +  |                   |
| 12               | male   | 56           | Fever                                                                             | Hypertrophic cardiomyopathy  | Ig G and M + |                   |
| 13               | male   | 97           | Fever, conjunctivitis, lymphadenopathy, red cracked lips                          |                              | Covid PCR +  |                   |
| 14               | male   | 158          | Fever, abdominal pain, vomiting, diarrhea, conjunctivitis, lymphadenopathy        |                              | Ig G and M + |                   |
| 15               | female | 188          | Fever, abdominal pain, vomiting, diarrhea, hypotension                            |                              | Ig G and M + |                   |
| 16               | female | 78           | Fever, abdominal pain, vomiting, diarrhea                                         |                              | Ig G and M + |                   |

|    |        |     |                                                                                                     |  |              |  |
|----|--------|-----|-----------------------------------------------------------------------------------------------------|--|--------------|--|
| 17 | female | 85  | Fever, abdominal pain,<br>vomiting, diarrhea,<br>conjunctivitis,<br>lymphadenopathy                 |  | Covid PCR -  |  |
| 18 | male   | 208 | Fever, chest pain                                                                                   |  | Covid PCR +  |  |
| 19 | female | 123 | Fever, abdominal pain,<br>vomiting, diarrhea,<br>conjunctivitis,<br>lymphadenopathy                 |  | Ig G and M + |  |
| 20 | female | 123 | Fever, cough                                                                                        |  | Ig G and M + |  |
| 21 | male   | 130 | Fever, abdominal pain,<br>vomiting, diarrhea,<br>conjunctivitis,<br>lymphadenopathy,<br>hypotension |  | Covid PCR -  |  |
| 22 | male   | 97  | Fever, abdominal pain,<br>vomiting, diarrhea,<br>conjunctivitis,<br>lymphadenopathy,<br>hypotension |  | Ig G and M + |  |
