# Supplementary material for: Cardiovascular Outcomes in Children with Multisystem Inflammatory Syndrome Treated with Therapeutic Plasma Exchange
Source: MDPI journal article supplement (doi:10.3390/children9111640), 2022-10-27
Supplement: s1 [file s1]

**Supplementary table S2.** Laboratory findings of patients at admission

| Group A subjects | WBC   | Hgb   | Platelet | CRP   | Sedimentation rate | Procalcitonin | Albumin | ALT | Ferritin | IL-6 | Fibrinogen | D-Dimer | Pro-BNP | Troponin I |
|------------------|-------|-------|----------|-------|--------------------|---------------|---------|-----|----------|------|------------|---------|---------|------------|
| 1                | 7600  | 11,9  | 231000   | 14,27 |                    | 0,24          | 40      | 10  | 229      | 12   | 657        | 1,8     | 980     | 146        |
| 2                | 6190  | 15,4  | 249000   | 1,5   |                    | 0,01          | 48      | 63  | 44       | 14,6 | 178        | 0,6     |         | 1404       |
| 3                | 4800  | 7     | 144000   | 5,09  |                    | 2,5           | 30      | 20  | 1022     | 8,65 | 585        | 2,0     |         | 86         |
| 4                | 6900  | 10,1  | 428000   | 12,6  |                    | 0,29          | 29      | 38  | 194      | 2,48 | 594        | 3,2     | 1100    | 761        |
| 5                | 500   | 7,1   | 700      | 255   | 14,00              | 8             | 23      | 107 | 2000     | 1700 | 408        | 0,3     | 1300    | 110        |
| 6                | 1700  | 8,8   | 152000   | 322   | 109,00             | 0,47          | 29      | 14  | 189      | 51   | 724        | 19,0    | 757     | 0          |
| 7                | 4000  | 10,8  | 263000   | 190   | 65,00              | 0,47          | 39      | 14  | 120      | 8    | 555        | 1,0     | 10      | 0          |
| 8                | 7400  | 11,7  | 129000   | 92    | 105,00             | 0,66          | 43      | 27  | 1383     | 7    | 555        | 3,4     | 1050    | 61         |
| 9                | 14900 | 13    | 200000   | 61    | 30,00              | 0,56          | 31      | 6   | 198      | 15   | 453        | 4,0     | 529     | 0          |
| 10               | 9290  | 12,9  | 313000   | 13,8  |                    | 0,12          | 41      | 13  | 69       |      | 304        | 0,4     | 850     | 31         |
| 11               | 4250  | 13,2  | 141000   | 113   | 48,00              | 16            | 40      | 23  | 357      | 514  | 485        | 5,2     | 879     | 0          |
| 12               | 7000  | 13,4  | 80000    | 159   | 28,00              | 0,54          | 42      | 7   | 178      |      | 479        | 0,6     | 98      | 0          |
| 13               | 5000  | 15    | 99000    | 212   | 6,00               | 1,37          | 29      | 71  | 1283     | 941  | 491        | 5,3     | 75      | 22         |
| 14               | 11300 | 8,5   | 312000   | 226   | 48,00              | 29            | 30      | 20  | 243      | 2000 | 545        | 5,7     | 1200    | 0          |
| 15               | 7300  | 12    | 181000   | 159   | 68,00              | 1,59          | 35      | 38  | 256      | 3    | 555        | 2,5     |         | 30         |
| 16               | 9000  | 9,8   | 259000   | 315   |                    | 5,53          | 25      | 13  | 483      | 11   | 625        | 3,5     | 1550    | 62         |
| Group B subjects |       |       |          |       |                    |               |         |     |          |      |            |         |         |            |
| 1                | 9650  | 10,40 | 80000    | 31    |                    | 38            | 28,7    | 22  | 2504     | 356  | 432        | 5,0     | 2100    | 1218       |
| 2                | 31000 | 9,6   | 73000    | 10    | 29,00              | 168           | 11,1    | 381 | 721      | 663  | 177        | 20,0    | 2010    | 106695     |
| 3                | 6200  | 11,8  | 239000   | 25    |                    | 13,5          | 32      | 14  | 454      | 222  | 522        | 2,9     | 1700    | 308        |
| 4                | 7700  | 8,8   | 374000   | 16    |                    | 7,61          | 28      | 17  | 1143     | 620  | 568        | 2,7     | 1650    | 46         |
| 5                | 10600 | 11,6  | 405000   | 25    |                    | 2,59          | 29      | 31  | 1031     | 10   | 658        | 2,0     | 1700    | 143        |
| 6                | 11700 | 13    | 281000   | 102   | 113,00             | 0,18          | 37      | 23  | 513      | 19   | 616        | 2,3     | 595     | 132        |
| 7                | 27000 | 7,6   | 61000    | 18    |                    | 3,18          | 42      | 17  | 3381     | 280  | 177        | 21,0    | 2400    | 430        |
| 8                | 3500  | 9,4   | 54000    | 149   | 21,00              | 35            | 27,8    | 20  | 303      | 137  | 308        | 35,0    | 15456   | 200        |
| 9                | 2900  | 10    | 218000   | 156   |                    | 18,8          | 28      | 28  | 128      |      | 176        | 1,1     | 4000    | 67         |
| 10               | 4300  | 13    | 16100    | 1,7   | 75,00              | 0,32          | 34      | 5   | 27       | 201  | 186        | 1,0     | 172     | 250        |
| 11               | 14000 | 7,3   | 446000   | 124   | 114,00             | 0,59          | 25      | 7   | 42       |      | 563        | 4,8     | 750     | 0          |
| 12               | 9600  | 12,5  | 235000   | 27    | 38,00              | 0,3           | 34      | 24  | 446      |      | 435        | 1,8     | 4628    | 680        |
| 13               | 5200  | 10,4  | 112000   | 158   | 113,00             | 6,9           | 37      | 10  | 477      | 92   | 629        | 4,0     | 536     | 55         |
| 14               | 7000  | 10,3  | 124000   | 190   |                    | 2,68          | 34      | 22  | 1236     | 11   | 642        | 1,1     | 413     | 40         |
| 15               | 10350 | 13,9  | 302000   | 54    | 27,00              | 53            | 48      | 10  | 650      | 53   | 484        | 4,7     | 2400    | 97         |
| 16               | 11500 | 8     | 282000   | 329   | 23,00              | 31            | 22      | 268 | 2100     | 81   | 472        | 4,2     | 35000   | 91         |
| 17               | 2900  | 7     | 78000    | 268   | 13,00              | 13            | 24      | 119 | 1360     | 106  | 407        | 20,0    |         | 35         |
| 18               | 3700  | 15    | 146000   | 8     | 4,00               | 0,05          | 42      | 81  | 308      | 52   | 371        | 0,4     |         | 0          |
| 19               | 8100  | 11,8  | 95000    | 113   | 113,00             | 32            | 35      | 27  | 691      | 1269 | 532        | 12,4    | 3068    | 23         |
| 20               | 8000  | 10    | 180000   | 157   | 19,00              | 3,61          | 33      | 62  | 349      | 336  | 605        | 3,6     | 3800    | 41         |
| 21               | 15800 | 10    | 229000   | 181   | 114,00             | 14,9          | 20      | 14  | 639      | 159  | 478        | 4,0     |         | 18         |
| 22               | 12300 | 9,5   | 105000   | 199   | 11,00              | 66            | 24      | 47  | 1940     | 174  | 425        | 5,7     | 18000   | 58         |
