# Supplementary material for: Cardiovascular Outcomes in Children with Multisystem Inflammatory Syndrome Treated with Therapeutic Plasma Exchange
Source: MDPI journal article supplement (doi:10.3390/children9111640), 2022-10-27
Supplement: s1 [file s1]

**Supplementary table S4.** Treatments given to patients other than therapeutic plasma exchange and sessions of therapeutic plasma exchange

| Group<br>A<br>Subjects | Intravenous<br>immunoglobulin | Systemic<br>steroids | Subcutaneous<br>enoxaparin<br>treatments | Invasive<br>mechanical<br>ventilation<br>support | Tocilizumab | Anakinra | Extracorporeal membrane<br>oxygenation | Number of sessions of<br>therapeutic plasma<br>exchange |
|------------------------|-------------------------------|----------------------|------------------------------------------|--------------------------------------------------|-------------|----------|----------------------------------------|---------------------------------------------------------|
| 1                      |                               |                      |                                          |                                                  |             |          |                                        |                                                         |
| 2                      | +                             |                      |                                          |                                                  |             |          |                                        |                                                         |
| 3                      |                               | +                    |                                          |                                                  |             |          |                                        |                                                         |
| 4                      | +                             | +                    | +                                        |                                                  |             |          |                                        |                                                         |
| 5                      | +                             | +                    |                                          | +                                                |             |          |                                        |                                                         |
| 6                      | +                             | +                    |                                          |                                                  |             |          |                                        |                                                         |
| 7                      | +                             |                      |                                          |                                                  |             |          |                                        |                                                         |
| 8                      |                               | +                    | +                                        |                                                  |             |          |                                        |                                                         |
| 9                      | +                             | +                    |                                          |                                                  |             |          |                                        |                                                         |
| 10                     | +                             |                      |                                          |                                                  |             |          |                                        |                                                         |
| 11                     | +                             | +                    |                                          |                                                  |             |          |                                        |                                                         |
| 12                     | +                             | +                    |                                          |                                                  |             |          |                                        |                                                         |
| 13                     | +                             | +                    |                                          |                                                  |             |          |                                        |                                                         |
| 14                     | +                             |                      |                                          |                                                  |             |          |                                        |                                                         |
| 15                     | +                             |                      |                                          |                                                  |             |          |                                        |                                                         |
| 16                     | +                             | +                    | +                                        |                                                  |             |          |                                        |                                                         |
| Group<br>B<br>subjects |                               |                      |                                          |                                                  |             |          |                                        |                                                         |
| 1                      | +                             | +                    |                                          |                                                  | +           |          | +                                      | 4                                                       |
| 2                      | +                             | +                    |                                          |                                                  | +           | +        | +                                      | 8                                                       |
| 3                      | +                             | +                    |                                          |                                                  |             |          |                                        | 5                                                       |
| 4                      | +                             | +                    |                                          |                                                  |             |          |                                        | 5                                                       |
| 5                      | +                             |                      |                                          |                                                  |             |          |                                        | 2                                                       |
| 6                      | +                             | +                    |                                          |                                                  |             |          |                                        | 5                                                       |
| 7                      | +                             | +                    |                                          |                                                  | +           | +        | +                                      | 5                                                       |
| 8                      | +                             | +                    |                                          | +                                                |             |          |                                        | 6                                                       |
| 9                      |                               |                      |                                          |                                                  |             |          |                                        | 5                                                       |
| 10                     |                               |                      |                                          |                                                  |             |          |                                        | 6                                                       |
| 11                     | +                             | +                    |                                          |                                                  |             |          |                                        | 5                                                       |
| 12                     | +                             | +                    | +                                        |                                                  |             |          |                                        | 9                                                       |
| 13                     | +                             | +                    | +                                        |                                                  |             |          |                                        | 5                                                       |
| 14                     | +                             | +                    |                                          |                                                  |             |          |                                        | 5                                                       |
| 15                     | +                             | +                    | +                                        |                                                  |             |          |                                        | 5                                                       |
| 16                     | +                             | +                    |                                          | +                                                |             |          |                                        | 5                                                       |
| 17                     | +                             | +                    |                                          | +                                                |             |          |                                        | 9                                                       |
| 18                     | +                             | +                    |                                          |                                                  |             |          |                                        | 3                                                       |
| 19                     | +                             | +                    |                                          |                                                  |             |          |                                        | 5                                                       |
| 20                     |                               | +                    | +                                        | +                                                |             |          |                                        | 5                                                       |
| 21                     | +                             | +                    | +                                        |                                                  |             |          |                                        | 5                                                       |
| 22                     | +                             | +                    | +                                        | +                                                |             |          |                                        | 5                                                       |
