# Supplementary material for: Cardiovascular Outcomes in Children with Multisystem Inflammatory Syndrome Treated with Therapeutic Plasma Exchange
Source: MDPI journal article supplement (doi:10.3390/children9111640), 2022-10-27
Supplement: s1 [file s1]

**Supplementary table S3.** Electrocardiographic and echocardiographic findings of the patients

| Group A subjects | ECG abnormalities and QTc values (millisecond)                                | Echocardiographic findings                                           | Mitral valve regurgitation | Reduced left ventricle systolic function defined as fractional shortening % | Aortic valve regurgitation |
|------------------|-------------------------------------------------------------------------------|----------------------------------------------------------------------|----------------------------|-----------------------------------------------------------------------------|----------------------------|
| 1                |                                                                               |                                                                      | Mild                       |                                                                             |                            |
| 2                |                                                                               |                                                                      |                            |                                                                             |                            |
| 3                | Low QRS voltage                                                               | Pericardial effusion and left ventricular hypertrophy                |                            |                                                                             |                            |
| 4                |                                                                               |                                                                      | Mild                       | 27                                                                          |                            |
| 5                | QT segment prolongation<br>QTc: 461                                           | Pericardial effusion and dilatation of left main coronary artery     |                            | 24                                                                          |                            |
| 6                |                                                                               |                                                                      | Mild                       |                                                                             |                            |
| 7                |                                                                               |                                                                      | Mild                       |                                                                             | Mild                       |
| 8                | QTc prolongation, negative T waves in V <sub>5</sub> and V <sub>6</sub> leads |                                                                      | Mild                       | 23                                                                          |                            |
| 9                |                                                                               |                                                                      | Mild                       |                                                                             |                            |
| 10               | Negative T waves in V <sub>5</sub> and V <sub>6</sub> leads                   |                                                                      | Mild                       |                                                                             |                            |
| 11               | Low QRS voltage                                                               | Dilatation of left main coronary and left anterior descending artery | moderate                   |                                                                             |                            |
| 12               | Low QRS voltage                                                               |                                                                      |                            |                                                                             |                            |
| 13               |                                                                               |                                                                      |                            |                                                                             |                            |
| 14               | ST segment depression/elevation                                               |                                                                      | Mild                       |                                                                             | Mild                       |
| 15               |                                                                               |                                                                      |                            |                                                                             |                            |
| 16               | QT segment prolongation<br>QTc: 455                                           | Pericardial effusion                                                 | moderate                   | 25                                                                          |                            |
| Group B subjects |                                                                               |                                                                      |                            |                                                                             |                            |
| 1                | Low QRS voltage                                                               |                                                                      | Mild                       | 20                                                                          |                            |
| 2                | Low QRS voltage, QT segment prolongation<br>QTc: 458                          |                                                                      | Mild                       | 22                                                                          | Mild                       |
| 3                |                                                                               |                                                                      | Mild                       | 24                                                                          |                            |
| 4                | First degree block                                                            | Increased perivascular echogenicity of the left main coronary artery | Mild                       |                                                                             |                            |
| 5                | ST segment depression/elevation                                               |                                                                      | Mild                       |                                                                             |                            |
| 6                | QT segment prolongation<br>QTc: 462                                           |                                                                      | Mild                       |                                                                             |                            |
| 7                |                                                                               | Left ventricular hypertrophy                                         | Mild                       | 20                                                                          |                            |
| 8                |                                                                               |                                                                      |                            |                                                                             |                            |
| 9                |                                                                               |                                                                      |                            |                                                                             |                            |
| 10               |                                                                               | Increased perivascular echogenicity of the left main coronary artery |                            |                                                                             |                            |
| 11               |                                                                               |                                                                      | Mild                       |                                                                             |                            |
| 12               | Left ventricular hypertrophy                                                  |                                                                      | Moderate                   |                                                                             | Mild                       |
| 13               |                                                                               |                                                                      |                            |                                                                             |                            |
| 14               |                                                                               |                                                                      |                            |                                                                             |                            |

|    |                                                                                    |                                             |          |    |      |
|----|------------------------------------------------------------------------------------|---------------------------------------------|----------|----|------|
| 15 | Low QRS voltage,<br>negative T waves in V <sub>5</sub><br>and V <sub>6</sub> leads |                                             | Mild     | 21 |      |
| 16 |                                                                                    |                                             | Mild     |    |      |
| 17 |                                                                                    |                                             | Mild     |    |      |
| 18 |                                                                                    | Asymmetrical septum<br>hypertrophy          |          |    |      |
| 19 |                                                                                    |                                             |          |    |      |
| 20 | Low QRS voltage,<br>QT segment<br>prolongation<br>QTc: 470                         | Dilatation of right main<br>coronary artery | Moderate |    |      |
| 21 | QT segment<br>prolongation<br>QTc: 460                                             | Left ventricular<br>hypertrophy             | Mild     |    |      |
| 22 | QT segment<br>prolongation<br>QTc: 475                                             |                                             | Mild     | 25 | Mild |
